# Supplementary material
Source: PubMed Central journal article supplement (PMC4839170)

## SUPPLEMENTARY DATA

### Online-Only Supplement

**Supplementary To:** Schneider ALC, Kalyani RR, Golden S, Stearns SC, Wruck L, Yeh HC, Coresh J, Selvin E. Diabetes and Pre-diabetes in Mid-life and Risk of Hospitalization: the Atherosclerosis Risk in Communities (ARIC) Study.

### Table of Contents

|                                                                                                                                                                                                                                                                                                                   | Page |
|-------------------------------------------------------------------------------------------------------------------------------------------------------------------------------------------------------------------------------------------------------------------------------------------------------------------|------|
| Supplementary Table 1. Demographic and Charlson Comorbidity Index adjusted rates of all-cause hospitalization per 1,000 person-years (95% confidence intervals) by baseline (1990-1992) diabetes and HbA1c category from negative binomial models, the ARIC study, 1990-2011.                                     | 2    |
| Supplementary Table 2. Multivariable adjusted rates of all-cause hospitalization per 1,000 person-years (95% confidence intervals) by baseline (1990-1992) diabetes and HbA1c category from negative binomial models, the ARIC study, 1990-2011.                                                                  | 3    |
| Supplementary Table 3. Demographic adjusted rates of all-cause hospitalization per 1,000 person-years (95% confidence intervals) by baseline (1990-1992) diabetes and HbA1c category (using HbA1c cutpoint of 8.0% among those with diagnosed diabetes) from negative binomial models, the ARIC study, 1990-2011. | 4    |
| Supplementary Table 4. Demographic adjusted rates of all-cause hospitalization per 1,000 person-years (95% confidence interval) by baseline (1990-1992) diabetes and HbA1c category from zero-inflated negative binomial models, the ARIC study, 1990-2011.                                                       | 5    |
| Supplementary Table 5. Demographic adjusted rates of all-cause hospitalization per 1,000 person-years (95% confidence interval) by baseline (1990-1992) diabetes and fasting glucose category from negative binomial models, the ARIC study, 1990-2011.                                                           | 6    |
| Supplementary Table 6. Most common primary cause for hospitalization and crude cause-specific rates per 1,000 person-years by baseline (1990-1992) diabetes status, the ARIC study, 1990-2011.                                                                                                                    | 7    |
| Supplementary Figure 1 Legend: Crude number of all-cause hospitalizations by baseline (1990-1992) diabetes and HbA1c category over a median of 20 years of follow-up, the ARIC Study, 1990-2011.                                                                                                                  | 9    |

SUPPLEMENTARY DATA

**Supplementary Table 1.** Demographic and Charlson Comorbidity Index adjusted\* rates of all-cause hospitalization per 1,000 person-years (95% confidence intervals) by baseline (1990-1992) diabetes and HbA1c category from negative binomial models, the ARIC study, 1990-2011.

|                        | No History of Diagnosed Diabetes |                 |                 | Diagnosed Diabetes |                  |
|------------------------|----------------------------------|-----------------|-----------------|--------------------|------------------|
|                        | HbA1c <5.7%                      | HbA1c 5.7-<6.5% | HbA1c ≥6.5%     | HbA1c <7.0%        | HbA1c ≥7.0%      |
| <b>Overall</b>         | 163 (158-168)                    | 217 (205-228)** | 254 (225-281)** | 331 (290-373)**    | 493 (453-533)**† |
| <b>By Race</b>         |                                  |                 |                 |                    |                  |
| White                  | 161 (156-166)                    | 229 (208-237)** | 260 (223-298)** | 292 (246-339)**    | 461 (414-508)**† |
| Black                  | 170 (155-185)                    | 210 (192-228)** | 253 (212-294)** | 416 (336-496)**    | 543 (475-612)**† |
| <b>By Sex</b>          |                                  |                 |                 |                    |                  |
| Men                    | 186 (177-194)                    | 248 (231-266)** | 275 (228-322)** | 384 (308-461)**    | 469 (416-522)**† |
| Women                  | 146 (140-153)                    | 194 (180-208)** | 236 (203-270)** | 295 (248-341)**    | 508 (450-565)**† |
| <b>By Baseline Age</b> |                                  |                 |                 |                    |                  |
| ≤55 Years              | 117 (111-123)                    | 159 (145-173)** | 178 (144-212)** | 258 (200-316)**    | 370 (318-422)**† |
| >55 Years              | 209 (201-218)                    | 270 (254-287)** | 328 (285-370)** | 397 (339-454)**    | 592 (535-650)**† |

\*Adjusted for age, sex, race/center, insurance status, and Charlson Comorbidity Index.

\*\* P<0.05, compared to HbA1c <5.7% (reference).

†P<0.05, HbA1c ≥7.0% versus HbA1c <7.0% (reference).

SUPPLEMENTARY DATA

**Supplementary Table 2.** Multivariable adjusted\* rates of all-cause hospitalization per 1,000 person-years (95% confidence intervals) by baseline (1990-1992) diabetes and HbA1c category from negative binomial models, the ARIC study, 1990-2011.

|                        | No History of Diagnosed Diabetes |                 |                 | Diagnosed Diabetes |                  |
|------------------------|----------------------------------|-----------------|-----------------|--------------------|------------------|
|                        | HbA1c <5.7%                      | HbA1c 5.7-<6.5% | HbA1c ≥6.5%     | HbA1c <7.0%        | HbA1c ≥7.0%      |
| <b>Overall</b>         | 164 (159-169)                    | 186 (176-195)** | 201 (180-222)** | 258 (228-287)**    | 366 (336-395)**† |
| <b>By Race</b>         |                                  |                 |                 |                    |                  |
| White                  | 160 (156-165)                    | 184 (173-196)** | 193 (167-220)** | 219 (189-248)**    | 331 (297-366)**† |
| Black                  | 174 (159-189)                    | 194 (177-210)   | 220 (186-255)** | 348 (279-416)**    | 428 (279-416)**† |
| <b>By Sex</b>          |                                  |                 |                 |                    |                  |
| Men                    | 186 (178-194)                    | 213 (198-227)** | 229 (193-266)** | 302 (251-352)**    | 364 (322-406)**† |
| Women                  | 148 (141-154)                    | 165 (153-177)** | 184 (158-208)** | 227 (191-263)**    | 367 (325-408)**† |
| <b>By Baseline Age</b> |                                  |                 |                 |                    |                  |
| ≤55 Years              | 117 (111-123)                    | 132 (120-144)** | 132 (108-155)   | 200 (157-242)**    | 279 (239-318)**† |
| >55 Years              | 212 (204-220)                    | 239 (225-253)** | 273 (238-308)** | 319 (276-361)**    | 452 (408-495)**† |

\*Adjusted for age, sex, race/center, education, income, insurance status, body-mass index, smoking, alcohol consumption, systolic and diastolic blood pressure, hypertension medication use, coronary heart disease, total and high-density lipoprotein cholesterol, cholesterol medication use, and estimated glomerular filtration rate.

\*\* P<0.05, compared to HbA1c <5.7% (reference).

†P<0.05, HbA1c ≥7.0% versus HbA1c <7.0% (reference).

SUPPLEMENTARY DATA

**Supplementary Table 3.** Demographic adjusted\* rates of all-cause hospitalization per 1,000 person-years (95% confidence intervals) by baseline (1990-1992) diabetes and HbA1c category (using HbA1c cutpoint of 8.0% among those with diagnosed diabetes) from negative binomial models, the ARIC study, 1990-2011.

|                        | No History of Diagnosed Diabetes |                              |                        | Diagnosed Diabetes     |                        |
|------------------------|----------------------------------|------------------------------|------------------------|------------------------|------------------------|
|                        | HbA1c <5.7%<br>(n=9,267)         | HbA1c 5.7-<6.5%<br>(n=2,441) | HbA1c ≥6.5%<br>(n=553) | HbA1c <8.0%<br>(n=655) | HbA1c ≥8.0%<br>(n=606) |
| <b>Overall</b>         | 163 (158-168)                    | 217 (206-228)**              | 254 (226-281)**        | 359 (322-397)**        | 548 (497-601)**†       |
| <b>By Race</b>         |                                  |                              |                        |                        |                        |
| White                  | 161 (156-167)                    | 223 (209-238)**              | 263 (225-302)**        | 320 (281-360)**        | 529 (46-597)**†        |
| Black                  | 170 (155-185)                    | 200 (191-227)**              | 251 (211-291)**        | 440 (360-520)**        | 580 (502-658)**†       |
| <b>By Sex</b>          |                                  |                              |                        |                        |                        |
| Men                    | 186 (178-195)                    | 248 (230-266)**              | 279 (231-327)**        | 382 (324-440)**        | 546 (471-622)**†       |
| Women                  | 146 (140-153)                    | 195 (180-209)**              | 236 (202-269)**        | 347 (297-396)**        | 541 (474-610)**†       |
| <b>By Baseline Age</b> |                                  |                              |                        |                        |                        |
| ≤55 Years              | 118 (111-124)                    | 163 (148-178)**              | 181 (145-217)**        | 274 (221-326)**        | 464 (391-538)**†       |
| >55 Years              | 209 (201-218)                    | 270 (254-287)**              | 320 (288-372)**        | 447 (393-501)**        | 635 (563-706)**†       |

\*Adjusted for age, sex, race/center, and insurance status.

\*\* P<0.05, compared to HbA1c <5.7% (reference).

†P<0.05, HbA1c ≥8.0% versus HbA1c <8.0% (reference).

SUPPLEMENTARY DATA

**Supplementary Table 4.** Demographic adjusted\* rates of all-cause hospitalization per 1,000 person-years (95% confidence interval) by baseline (1990-1992) diabetes and HbA1c category from zero-inflated negative binomial models, the ARIC study, 1990-2011.

|                        | No History of Diagnosed Diabetes |                 |                 | Diagnosed Diabetes |                  |
|------------------------|----------------------------------|-----------------|-----------------|--------------------|------------------|
|                        | HbA1c <5.7%                      | HbA1c 5.7-<6.5% | HbA1c ≥6.5%     | HbA1c <7.0%        | HbA1c ≥7.0%      |
| <b>Overall</b>         | 166 (159-172)                    | 217 (206-229)** | 259 (226-293)** | 341 (297-384)**    | 511 (464-557)**† |
| <b>By Race</b>         |                                  |                 |                 |                    |                  |
| White                  | 162 (156-169)                    | 224 (210-238)** | 263 (225-302)** | 301 (251-350)**    | 483 (431-535)**† |
| Black                  | 174 (158-190)                    | 210 (191-229)** | 259 (213-305)** | 434 (348-521)**    | 554 (483-626)**† |
| <b>By Sex</b>          |                                  |                 |                 |                    |                  |
| Men                    | 189 (180-198)                    | 248 (231-266)** | 281 (232-330)** | 401 (319-484)**    | 481 (424-537)**† |
| Women                  | 149 (141-156)                    | 195 (180-210)** | 2453(207-279)** | 302 (254-350)**    | 524 (462-586)**† |
| <b>By Baseline Age</b> |                                  |                 |                 |                    |                  |
| ≤55 Years              | 118 (112-124)                    | 163 (148-178)** | 181 (145-217)** | 280 (215-346)**    | 416 (356-476)**† |
| >55 Years              | 211 (203-219)                    | 270 (253-287)** | 329 (287-371)** | 405 (345-465)**    | 599 (539-658)**† |

\*Adjusted for age, sex, race/center, and insurance status.

\*\* P<0.05, compared to HbA1c <5.7% (reference).

†P<0.05, HbA1c ≥7.0% versus HbA1c <7.0% (reference).

SUPPLEMENTARY DATA

**Supplementary Table 5.** Demographic adjusted\* rates of all-cause hospitalization per 1,000 person-years (95% confidence interval) by baseline (1990-1992) diabetes and fasting glucose category from negative binomial models, the ARIC study, 1990-2011.

|                        | No History of Diagnosed Diabetes |                                   |                               | Diagnosed Diabetes            |                               |
|------------------------|----------------------------------|-----------------------------------|-------------------------------|-------------------------------|-------------------------------|
|                        | Fasting Glucose<br><100 mg/dl    | Fasting Glucose<br>100-<126 mg/dl | Fasting Glucose<br>≥126 mg/dl | Fasting Glucose<br><150 mg/dl | Fasting Glucose<br>≥150 mg/dl |
| <b>Overall</b>         | 167 (160-174)                    | 181 (174-188)**                   | 221 (203-240)**               | 381 (328-433)**               | 472 (433-510)**†              |
| <b>By Race</b>         |                                  |                                   |                               |                               |                               |
| White                  | 163 (155-170)                    | 177 (170-185)**                   | 225 (202-248)**               | 332 (276-389)**               | 445 (398-492)**†              |
| Black                  | 183 (165-201)                    | 192 (176-209)                     | 222 (191-254)**               | 491 (377-604)**               | 531 (467-595)**               |
| <b>By Sex</b>          |                                  |                                   |                               |                               |                               |
| Men                    | 203 (189-217)                    | 200 (191-210)                     | 232 (206-258)**               | 463 (367-559)**               | 436 (388-484)**               |
| Women                  | 144 (137-152)                    | 168 (159-178)**                   | 216 (190-243)**               | 328 (269-388)**               | 495 (440-549)**†              |
| <b>By Baseline Age</b> |                                  |                                   |                               |                               |                               |
| ≤55 Years              | 117 (109-124)                    | 131 (123-140)**                   | 174 (148-199)**               | 301 (228-374)**               | 396 (340-452)**†              |
| >55 Years              | 220 (207-232)                    | 231 (222-241)                     | 270 (243-296)**               | 463 (389-538)**               | 556 (503-609)**               |

\*Adjusted for age, sex, race/center, and insurance status.

\*\* P<0.05, compared to fasting glucose <100 mg/dl (reference).

†P<0.05, fasting glucose ≥150 mg/dl versus fasting glucose <150 mg/dl (reference).

SUPPLEMENTARY DATA

**Supplementary Table 6.** Most common primary cause for hospitalization and crude cause-specific rates per 1,000 person-years by baseline (1990-1992) diabetes status, the ARIC study, 1990-2011.

| No History of Diagnosed Diabetes<br>(35,861 hospitalizations among n=12,261 participants) |                               | Diagnosed Diabetes<br>(7,211 hospitalizations among 1,261 participants) |                               |
|-------------------------------------------------------------------------------------------|-------------------------------|-------------------------------------------------------------------------|-------------------------------|
| Primary Cause of Hospitalization                                                          | Rate (95% CI)<br>per 1,000 PY | Primary Cause of Hospitalization                                        | Rate (95% CI) per<br>1,000 PY |
| <b>1 Cardiovascular:</b>                                                                  | <b>63.9 (62.9-65.0)</b>       | <b>1 Cardiovascular:</b>                                                | <b>174.9 (169.5-180.4)</b>    |
| 1.1 Coronary atherosclerosis                                                              | 12.4 (11.9-12.8)              | 1.1 Congestive heart failure                                            | 35.8 (33.2-38.5)              |
| 1.2 Cardiac dysrhythmias                                                                  | 7.8 (7.3-8.0)                 | 1.2 Coronary atherosclerosis                                            | 32.6 (30.2-35.3)              |
| 1.3 Nonhypertensive congestive heart failure                                              | 6.2 (5.9-6.6)                 | 1.3 Hypertension with complications                                     | 18.3 (16.5-20.3)              |
| <b>2 Gastrointestinal:</b>                                                                | <b>15.6 (15.1-16.1)</b>       | <b>2 Endocrine:</b>                                                     | <b>53.1 (50.0-56.4)</b>       |
| 2.1 Biliary tract disease                                                                 | 3.0 (2.8-3.3)                 | 2.1 Diabetes mellitus with complications                                | 32.0 (29.6-34.7)              |
| 2.2 Diverticulosis/diverticulitis                                                         | 1.8 (1.7-2.0)                 | 2.2 Diabetes mellitus without complications                             | 13.5 (11.9-15.2)              |
| 2.3 Gastrointestinal hemorrhage                                                           | 1.8 (1.6-2.0)                 | 2.3 Fluid and electrolyte disorders                                     | 5.1 (4.2-6.3)                 |
| <b>3-Neoplasm:</b>                                                                        | <b>15.3 (14.8-15.9)</b>       | <b>3 Respiratory:</b>                                                   | <b>26.6 (24.4-29.0)</b>       |
| 3.1 Secondary malignancies                                                                | 1.9 (1.7-2.1)                 | 3.1 Pneumonia                                                           | 8.7 (7.5-10.1)                |
| 3.2 Maintenance chemotherapy/radiotherapy                                                 | 1.6 (1.4-1.7)                 | 3.2 Chronic obstructive pulmonary disease                               | 3.8 (3.0-4.8)                 |
| 3.3 Lung cancer                                                                           | 1.5 (1.4-1.7)                 | 3.3 Respiratory failure                                                 | 3.7 (2.9-4.7)                 |
| <b>4 Musculoskeletal:</b>                                                                 | <b>13.6 (13.2-14.1)</b>       | <b>4 Gastrointestinal:</b>                                              | <b>25.2 (23.1-27.6)</b>       |
| 4.1 Osteoarthritis                                                                        | 6.5 (6.1-6.8)                 | 4.1 Gastrointestinal hemorrhage                                         | 4.4 (3.5-5.5)                 |
| 4.2 Spondylosis                                                                           | 4.0 (3.7-4.2)                 | 4.2 Biliary tract disease                                               | 4.0 (3.2-5.0)                 |
| 4.3 Other connective tissue disease                                                       | 1.1 (1.0-1.3)                 | 4.3 Esophageal disorders                                                | 2.1 (1.5-2.9)                 |
| <b>5 Respiratory:</b>                                                                     | <b>13.1 (12.6-13.6)</b>       | <b>5 Iatrogenic/Injury:</b>                                             | <b>23.3 (21.2-25.6)</b>       |
| 5.1 Pneumonia                                                                             | 4.6 (4.3-4.9)                 | 5.1 Complications of device/implant/graft                               | 8.8 (7.5-10.2)                |
| 5.2 Chronic obstructive pulmonary disease                                                 | 3.0 (2.8-3.2)                 | 5.2 Complications of surgical procedures                                | 4.7 (3.8-5.8)                 |
| 5.3 Respiratory failure                                                                   | 1.4 (1.2-1.6)                 | 5.3 Fracture of neck of femur (hip)                                     | 2.4 (1.8-3.2)                 |
| <b>6 Iatrogenic/Injury:</b>                                                               | <b>10.8 (10.4-11.3)</b>       | <b>6 Neoplasm:</b>                                                      | <b>18.1 (16.3-20.1)</b>       |
| 6.1 Complications of device/implant/graft                                                 | 2.8 (2.6-3.0)                 | 6.1 Secondary malignancies                                              | 2.5 (1.6-3.3)                 |
| 6.2 Complications of surgical procedures                                                  | 2.2 (2.0-2.4)                 | 6.2 Breast cancer                                                       | 1.9 (1.4-2.7)                 |
| 6.3 Fracture of neck of femur (hip)                                                       | 1.1 (0.9-1.2)                 | 6.3 Maintenance chemotherapy/radiotherapy                               | 1.8 (1.3-2.6)                 |
| <b>7 Genitourinary:</b>                                                                   | <b>8.4 (8.1-8.8)</b>          | <b>7 Genitourinary:</b>                                                 | <b>14.9 (13.3-16.8)</b>       |
| 7.1 Urinary tract infection                                                               | 1.6 (1.5-1.8)                 | 7.1 Acute renal failure                                                 | 5.1 (4.1-6.2)                 |
| 7.2 Prolapse of female genital organs                                                     | 1.3 (1.2-1.5)                 | 7.2 Urinary tract infection                                             | 4.3 (3.5-5.4)                 |
| 7.3 Acute renal disease                                                                   | 1.2 (1.1-1.4)                 | 7.3 Calculus of urinary tract                                           | 1.1 (0.7-1.7)                 |

SUPPLEMENTARY DATA

|                                             |                      |                                     |                         |
|---------------------------------------------|----------------------|-------------------------------------|-------------------------|
| <b>8 Endocrine:</b>                         | <b>5.5 (5.2-5.8)</b> | <b>8 Musculoskeletal:</b>           | <b>12.8 (11.3-14.5)</b> |
| 8.1 Fluid and electrolyte disorders         | 1.8 (1.6-2.0)        | 8.1 Spondylosis                     | 4.5 (3.6-5.6)           |
| 8.2 Diabetes mellitus without complications | 1.4 (1.3-1.6)        | 8.2 Osteoarthritis                  | 4.4 (3.5-5.4)           |
| 8.3 Diabetes mellitus with complications    | 1.2 (1.1-1.4)        | 8.3 Other connective tissue disease | 1.7 (1.2-2.4)           |
| <b>9 Neurologic:</b>                        | <b>3.4 (3.1-3.6)</b> | <b>9 Neurologic:</b>                | <b>7.0 (5.9-8.3)</b>    |
| 9.1 Other nervous system disorders          | 0.8 (0.6-0.9)        | 9.1 Epilepsy; seizures              | 1.2 (0.8-1.8)           |
| 9.2 Conditions associated with dizziness    | 0.6 (0.4-0.7)        | 9.2 Other nervous system disorders  | 1.1 (0.7-1.7)           |
| 9.3 Epilepsy; seizures                      | 0.5 (0.4-0.6)        | 9.3 Other eye disorders             | 0.6 (0.4-1.2)           |
| <b>10 Infection:</b>                        | <b>2.6 (2.4-2.8)</b> | <b>10 Infection:</b>                | <b>6.8 (5.7-8.1)</b>    |
| 10.1 Sepsis                                 | 2.0 (1.8-2.2)        | 10.1 Sepsis                         | 5.7 (4.7-6.9)           |
| 10.2 Viral infection                        | 0.2 (0.1-0.3)        | 10.2 Fungal infection               | 0.4 (0.2-0.9)           |
| 10.3 Fungal infection                       | 0.1 (0.09-0.2)       | 10.3 Viral infection                | 0.4 (0.2-0.8)           |

Note: Table shows the 10 most common body systems diagnoses and the 3 most common disease diagnoses within each body system.



SUPPLEMENTARY DATA

**Supplementary Figure 1.** Crude number of all-cause hospitalizations by baseline (1990-1992) diabetes and HbA1c category over a median of 20 years of follow-up, the ARIC Study, 1990-2011.

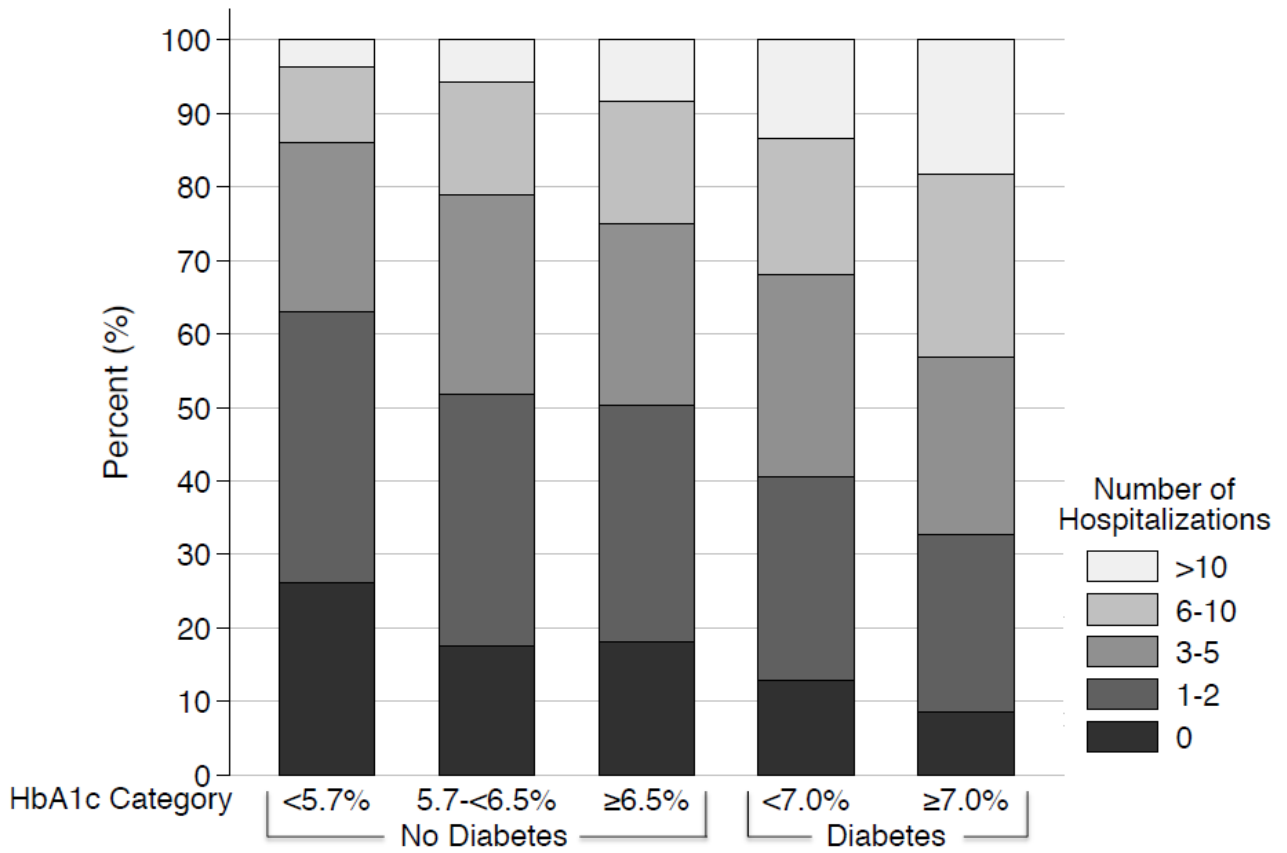

Supplement: supp_dc15-1335v151335_DC151335SupplementaryData.pdf [file supp_dc15-1335v151335_DC151335SupplementaryData.pdf]
